# Supplementary material for: Development and Validation of a RNA Binding Protein-Associated Prognostic Model for Hepatocellular Carcinoma
Source: PubMed Central journal article supplement — Technol Cancer Res Treat. 2021 Apr 29;20:15330338211004936. doi: 10.1177/15330338211004936 (PMC8111555; doi:10.1177/15330338211004936), 2021-04-29
Supplement: sj-pdf-1-tct-10.1177_15330338211004936.pdf [file sj-pdf-1-tct-10.1177_15330338211004936.pdf]

Table S1. GO enrichment analysis of aberrantly expressed RBPs.

|                                                           | <b>GO term</b>                                                                       | <b>p value</b> | <b>FDR</b> |
|-----------------------------------------------------------|--------------------------------------------------------------------------------------|----------------|------------|
| <b>Up-regulated RBPs</b>                                  | ncRNA processing                                                                     | 5.72E-38       | 7.63E-35   |
|                                                           | RNA splicing                                                                         | 1.75E-37       | 1.17E-34   |
|                                                           | RNA splicing, via transesterification reactions with bulged adenosine as nucleophile | 1.67E-28       | 5.58E-26   |
|                                                           | mRNA splicing, via spliceosome                                                       | 1.67E-28       | 5.58E-26   |
|                                                           | RNA splicing, via transesterification reactions                                      | 2.26E-28       | 6.03E-26   |
|                                                           | RNA 3'-end processing                                                                | 2.32E-22       | 5.16E-20   |
|                                                           | RNA catabolic process                                                                | 3.33E-21       | 6.34E-19   |
|                                                           | tRNA processing                                                                      | 3.95E-21       | 6.58E-19   |
|                                                           | tRNA metabolic process                                                               | 6.40E-21       | 9.48E-19   |
|                                                           | mRNA catabolic process                                                               | 3.36E-18       | 4.47E-16   |
|                                                           | spliceosomal complex                                                                 | 1.76E-21       | 2.50E-19   |
|                                                           | cytoplasmic ribonucleoprotein granule                                                | 2.58E-14       | 1.84E-12   |
|                                                           | ribonucleoprotein granule                                                            | 6.79E-14       | 3.22E-12   |
|                                                           | small nuclear ribonucleoprotein complex                                              | 1.08E-13       | 3.84E-12   |
|                                                           | Sm-like protein family complex                                                       | 4.86E-13       | 1.38E-11   |
|                                                           | spliceosomal snRNP complex                                                           | 8.47E-13       | 2.00E-11   |
|                                                           | catalytic step 2 spliceosome                                                         | 2.74E-12       | 5.56E-11   |
|                                                           | U2-type spliceosomal complex                                                         | 4.29E-12       | 7.62E-11   |
|                                                           | ribosome                                                                             | 2.47E-11       | 3.90E-10   |
|                                                           | U2-type precatalytic spliceosome                                                     | 4.67E-11       | 6.64E-10   |
|                                                           | catalytic activity, acting on RNA                                                    | 3.11E-29       | 5.07E-27   |
|                                                           | mRNA 3'-UTR binding                                                                  | 5.18E-15       | 4.23E-13   |
|                                                           | catalytic activity, acting on a tRNA                                                 | 8.47E-12       | 4.61E-10   |
|                                                           | endoribonuclease activity                                                            | 1.36E-10       | 5.53E-09   |
|                                                           | ribonucleoprotein complex binding                                                    | 3.53E-10       | 1.15E-08   |
|                                                           | ribonuclease activity                                                                | 5.63E-10       | 1.53E-08   |
|                                                           | RNA helicase activity                                                                | 1.24E-09       | 2.68E-08   |
|                                                           | tRNA binding                                                                         | 1.31E-09       | 2.68E-08   |
| snRNA binding                                             | 2.47E-09                                                                             | 4.47E-08       |            |
| endoribonuclease activity, producing 5'-phosphomonoesters | 3.40E-09                                                                             | 5.54E-08       |            |
| <b>Down-regulated RBPs</b>                                | regulation of translation                                                            | 3.73E-24       | 5.28E-21   |
|                                                           | regulation of cellular amide metabolic process                                       | 1.64E-22       | 1.16E-19   |
|                                                           | RNA phosphodiester bond hydrolysis                                                   | 8.66E-16       | 4.09E-13   |
|                                                           | negative regulation of translation                                                   | 6.39E-15       | 2.26E-12   |
|                                                           | negative regulation of cellular amide metabolic process                              | 2.91E-14       | 8.25E-12   |
|                                                           | defense response to virus                                                            | 5.50E-14       | 1.16E-11   |
|                                                           | regulation of mRNA metabolic process                                                 | 5.75E-14       | 1.16E-11   |
|                                                           | RNA catabolic process                                                                | 2.03E-13       | 3.35E-11   |
|                                                           | nucleic acid phosphodiester bond hydrolysis                                          | 2.13E-13       | 3.35E-11   |

|                                       |          |          |
|---------------------------------------|----------|----------|
| response to virus                     | 7.82E-13 | 1.11E-10 |
| cytoplasmic ribonucleoprotein granule | 1.91E-12 | 2.15E-10 |
| ribonucleoprotein granule             | 3.97E-12 | 2.23E-10 |
| P-body                                | 3.38E-08 | 1.06E-06 |
| CCR4-NOT complex                      | 3.78E-08 | 1.06E-06 |
| ribosome                              | 7.18E-08 | 1.62E-06 |
| ribosomal subunit                     | 1.84E-07 | 3.45E-06 |
| organellar ribosome                   | 8.05E-07 | 1.13E-05 |
| mitochondrial ribosome                | 8.05E-07 | 1.13E-05 |
| organellar large ribosomal subunit    | 1.03E-06 | 1.17E-05 |
| mitochondrial large ribosomal subunit | 1.03E-06 | 1.17E-05 |
| catalytic activity, acting on RNA     | 2.76E-22 | 4.27E-20 |
| single-stranded RNA binding           | 8.03E-20 | 6.21E-18 |
| double-stranded RNA binding           | 2.21E-18 | 1.14E-16 |
| ribonuclease activity                 | 3.98E-14 | 1.40E-12 |
| mRNA 3'-UTR binding                   | 4.52E-14 | 1.40E-12 |
| nuclease activity                     | 9.97E-12 | 2.57E-10 |
| mRNA 3'-UTR AU-rich region binding    | 3.46E-10 | 7.65E-09 |
| AU-rich element binding               | 6.16E-10 | 1.19E-08 |
| translation regulator activity        | 7.19E-09 | 1.24E-07 |
| endonuclease activity                 | 1.64E-08 | 2.53E-07 |
