# Supplementary material for: Development and Validation of a RNA Binding Protein-Associated Prognostic Model for Hepatocellular Carcinoma
Source: PubMed Central journal article supplement — Technol Cancer Res Treat. 2021 Apr 29;20:15330338211004936. doi: 10.1177/15330338211004936 (PMC8111555; doi:10.1177/15330338211004936), 2021-04-29
Supplement: sj-pdf-2-tct-10.1177_15330338211004936.pdf [file sj-pdf-2-tct-10.1177_15330338211004936.pdf]

Table S2. KEGG pathway analysis of aberrantly expressed RBPs

|                            | <b>KEGG term</b>                      | <b>p value</b> | <b>FDR</b> |
|----------------------------|---------------------------------------|----------------|------------|
| <b>Up-regulated RBPs</b>   | Spliceosome                           | 1.03E-13       | 3.89E-12   |
|                            | mRNA surveillance pathway             | 2.84E-13       | 5.39E-12   |
|                            | RNA transport                         | 2.87E-11       | 3.62E-10   |
|                            | RNA degradation                       | 9.82E-08       | 9.30E-07   |
|                            | Ribosome biogenesis in eukaryotes     | 1.85E-06       | 1.40E-05   |
|                            | Ribosome                              | 4.59E-06       | 2.90E-05   |
|                            | Homologous recombination              | 0.008533       | 0.046194   |
| <b>Down-regulated RBPs</b> | RNA degradation                       | 1.32E-05       | 5.70E-04   |
|                            | Ribosome biogenesis in eukaryotes     | 9.12E-05       | 1.84E-03   |
|                            | Influenza A                           | 0.000128       | 1.84E-03   |
|                            | Hepatitis C                           | 0.000561       | 6.06E-03   |
|                            | RIG-I-like receptor signaling pathway | 0.001202       | 1.04E-02   |
|                            | Measles                               | 0.002234       | 1.61E-02   |
|                            | mRNA surveillance pathway             | 0.003157       | 1.95E-02   |
|                            | Herpes simplex virus 1 infection      | 0.004977       | 2.69E-02   |
|                            | RNA transport                         | 0.006939       | 3.33E-02   |
